# Supplementary material for: A first-principles investigation of a new hard multi-layered MnB2 structure
Source: Royal Society of Chemistry journal article supplement (doi:10.1039/c6ra27148k), 2017-01-01
Supplement: c6ra27148k1.pdf [file c6ra27148k1.pdf]

## A first-principles investigation of a new hard multi-layers $\text{MnB}_2$ structure

Chunhong Xu,<sup>a</sup> Kuo Bao,<sup>a</sup> Shuailing Ma,<sup>a</sup> Yanbin Ma,<sup>a</sup> Shuli Wei,<sup>a</sup> Ziji Shao,<sup>a</sup> Xuehui Xiao,<sup>a</sup> Xiaokang Feng,<sup>a</sup> Tian Cui<sup>\*a</sup>

State Key Laboratory of Superhard Materials, College of Physics, Jilin University, Changchun, 130012, People's Republic of China.

E-mail: cuitian@jlu.edu.cn

**Table S1.** Calculated elastic constants  $C_{ij}$  (GPa) for *Immm*- $\text{MnB}_2$  and some common transition metal diborides  $\text{TM}\text{B}_2$  (TM= Ta, W, Re) at P= 0 or 50 GPa.

| Structure                                  | P  | $C_{11}$         | $C_{22}$ | $C_{33}$          | $C_{44}$         | $C_{55}$ | $C_{66}$         | $C_{12}$         | $C_{13}$         | $C_{23}$ |
|--------------------------------------------|----|------------------|----------|-------------------|------------------|----------|------------------|------------------|------------------|----------|
| <i>Immm</i> - $\text{MnB}_2$               | 0  | 653              | 442      | 643               | 273              | 161      | 166              | 178              | 170              | 189      |
|                                            | 50 | 910              | 673      | 899               | 374              | 239      | 231              | 242              | 240              | 312      |
| <i>P6/mmm</i> - $\text{TaB}_2$             | 0  | 605              |          | 475               | 233              |          | 225              | 154              | 206              |          |
|                                            | 0  |                  |          |                   |                  |          |                  |                  |                  |          |
|                                            | 0  | 598 <sup>a</sup> |          | 442 <sup>a</sup>  | 208 <sup>a</sup> |          | 227 <sup>a</sup> | 145 <sup>a</sup> | 214 <sup>a</sup> |          |
| <i>P6<sub>3</sub>/mmc</i> - $\text{WB}_2$  | 0  | 550              |          | 650               | 225              |          | 188              | 173              | 221              |          |
|                                            | 0  | 571 <sup>b</sup> |          | 672 <sup>b</sup>  | 202 <sup>b</sup> |          | 213 <sup>b</sup> | 145 <sup>b</sup> | 200 <sup>b</sup> |          |
| <i>P6<sub>3</sub>/mmc</i> - $\text{ReB}_2$ | 0  | 626              |          | 1045              | 263              |          | 223              | 180              | 122              |          |
|                                            | 0  | 643 <sup>c</sup> |          | 1035 <sup>c</sup> | 263 <sup>c</sup> |          | 244 <sup>c</sup> | 159 <sup>c</sup> | 129 <sup>c</sup> |          |
|                                            | 0  | 675 <sup>d</sup> |          | 1081 <sup>d</sup> | 278 <sup>d</sup> |          | 264 <sup>d</sup> | 147 <sup>d</sup> | 115 <sup>d</sup> |          |

<sup>a</sup> Ref 42, <sup>b</sup> Ref 43, <sup>c</sup> Ref 44, <sup>d</sup> Ref 16

**Fig. S1.** The calculated energy versus volume curves for *Immm*-MnB<sub>2</sub> using non-spin-polarized and spin-polarized calculations.

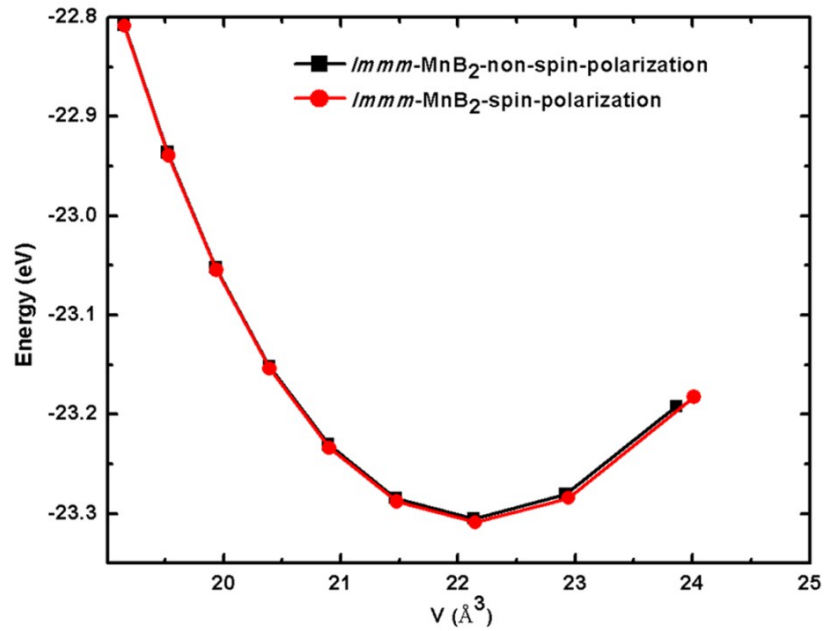

**Fig. S2.** Magnetic moment versus pressure for *Immm*-MnB<sub>2</sub> using spin-polarized calculation.

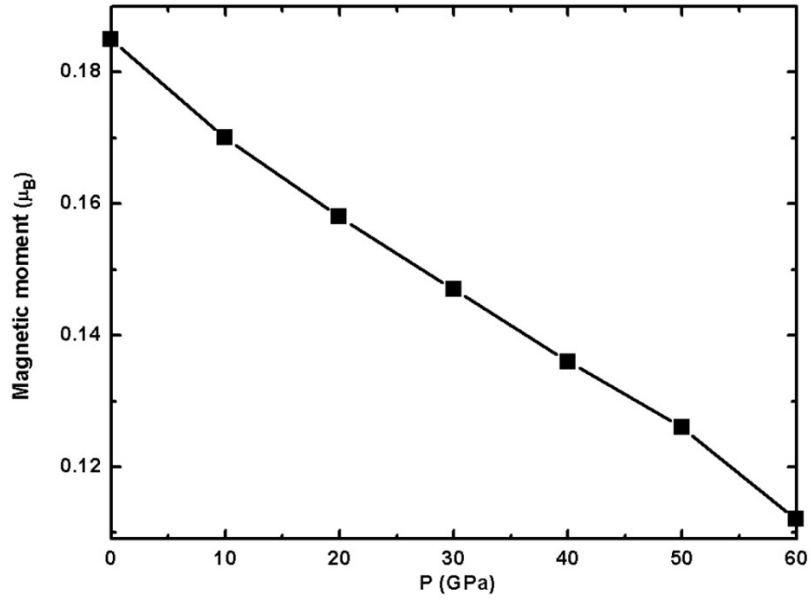

**Table S2.** Bader charge analysis for *Immm*-MnB<sub>2</sub> at 0 GPa.

| <i>Immm</i> -MnB <sub>2</sub> |                  |       |
|-------------------------------|------------------|-------|
| Atom                          | Charge value (e) | δ(e)  |
| Mn                            | 12.36            | 0.64  |
| Mn                            | 12.36            | 0.64  |
| Mn                            | 12.52            | 0.48  |
| B                             | 3.42             | -0.42 |
| B                             | 3.45             | -0.45 |
| B                             | 3.42             | -0.42 |
| B                             | 3.45             | -0.45 |
| B                             | 3.20             | -0.20 |
| B                             | 3.16             | -0.16 |
| B                             | 3.20             | -0.20 |
| B                             | 3.16             | -0.16 |
| B                             | 3.20             | -0.20 |
| B                             | 3.16             | -0.16 |
| B                             | 3.20             | -0.20 |
| B                             | 3.16             | -0.16 |
